# Supplementary material for: Extinction and the U.S. Endangered Species Act
Source: PeerJ journal article supplement (doi:10.7717/peerj.6803), 2019-04-22
Supplement: Greenwald_et_al_SuppIementary_Info.pdf [file Greenwald_et_al_SuppIementary_Info.pdf]

**Table 1.** Extinct and possibly extinct species last seen before listing under the Endangered Species Act.

| Common Name                                              | Scientific                                      | Listed | Last Seen | Status            | NS/IUCN  | Taxonomic Group | Region               | Source                         |
|----------------------------------------------------------|-------------------------------------------------|--------|-----------|-------------------|----------|-----------------|----------------------|--------------------------------|
| Oahu tree snail                                          | <i>Achatinella buddii</i>                       | 1981   | ~1900     | Possibly extinct  | GX/EX    | Mollusk         | Hawaii and Pacific I | USFWS 1992, 2011a              |
| Oahu tree snail                                          | <i>Achatinella casta</i>                        | 1981   | <1900     | Possibly extinct  | GX/EX    | Mollusk         | Hawaii and Pacific I | USFWS 2011a                    |
| Oahu tree snail                                          | <i>Achatinella caesia</i>                       | 1981   | ~1900     | Possibly extinct  | GX/EX    | Mollusk         | Hawaii and Pacific I | USFWS 1992, 2011a              |
| Oahu tree snail                                          | <i>Achatinella cestus</i>                       | 1981   | 1966      | Possibly extinct  | G1 TH/CR | Mollusk         | Hawaii and Pacific I | USFWS 2011a                    |
| Oahu tree snail                                          | <i>Achatinella decora</i>                       | 1981   | 1900      | Possibly extinct  | GX/EX    | Mollusk         | Hawaii and Pacific I | USFWS 2011a                    |
| Oahu tree snail                                          | <i>Achatinella dimorpha</i>                     | 1981   | 1967      | Possibly extinct  | GH/EX    | Mollusk         | Hawaii and Pacific I | USFWS 2011a                    |
| Oahu tree snail                                          | <i>Achatinella elegans</i>                      | 1981   | 1952      | Possibly extinct  | G1 TH/EX | Mollusk         | Hawaii and Pacific I | USFWS 2011a                    |
| Oahu tree snail                                          | <i>Achatinella juddii</i>                       | 1981   | 1958      | Possibly extinct  | GH/EX    | Mollusk         | Hawaii and Pacific I | USFWS 2011a                    |
| Oahu tree snail                                          | <i>Achatinella juncea</i>                       | 1981   | Unknown   | Possibly extinct  | GH/EX    | Mollusk         | Hawaii and Pacific I | USFWS 2011a                    |
| Oahu tree snail                                          | <i>Achatinella lehuiensis</i>                   | 1981   | 1922      | Possibly extinct  | GX/EX    | Mollusk         | Hawaii and Pacific I | USFWS 2011a                    |
| Oahu tree snail                                          | <i>Achatinella lorata</i>                       | 1981   | 1979      | Possibly extinct  | GH/CR    | Mollusk         | Hawaii and Pacific I | USFWS 2011a                    |
| Oahu tree snail                                          | <i>Achatinella papyracea</i>                    | 1981   | <1945     | Possibly extinct  | GX/EX    | Mollusk         | Hawaii and Pacific I | USFWS 1992, 2011a              |
| Oahu tree snail                                          | <i>Achatinella phaeozona</i>                    | 1981   | 1974      | Possibly extinct  | GH/CR    | Mollusk         | Hawaii and Pacific I | USFWS 1992, 2011a              |
| Oahu tree snail                                          | <i>Achatinella pupukanioe</i>                   | 1981   | 1980      | Possibly extinct  | GH/CR    | Mollusk         | Hawaii and Pacific I | USFWS 2011a                    |
| Oahu tree snail                                          | <i>Achatinella rosea</i>                        | 1981   | 1949      | Possibly extinct  | G1 TX/EX | Mollusk         | Hawaii and Pacific I | USFWS 1992, 2011a              |
| Oahu tree snail                                          | <i>Achatinella spaldingi</i>                    | 1981   | 1938      | Possibly extinct  | GX/EX    | Mollusk         | Hawaii and Pacific I | USFWS 1992, 2011a              |
| Oahu tree snail                                          | <i>Achatinella swiftii</i>                      | 1981   | 1970's    | Possibly extinct  | GH/CR    | Mollusk         | Hawaii and Pacific I | USFWS 1992, 2011a              |
| Oahu tree snail                                          | <i>Achatinella taeniolata</i>                   | 1981   | 1966      | Possibly extinct  | GH/CR    | Mollusk         | Hawaii and Pacific I | USFWS 1992, 2011a              |
| Oahu tree snail                                          | <i>Achatinella thanumi</i>                      | 1981   | 1900      | Possibly extinct  | GX/EX    | Mollusk         | Hawaii and Pacific I | USFWS 1992, 2011a              |
| Oahu tree snail                                          | <i>Achatinella turgida</i>                      | 1981   | 1974      | Possibly extinct  | GX/CR    | Mollusk         | Hawaii and Pacific I | USFWS 1992, 2011a              |
| Oahu tree snail                                          | <i>Achatinella valida</i>                       | 1981   | 1951      | Possibly extinct  | GX/EX    | Mollusk         | Hawaii and Pacific I | USFWS 1992, 2011a              |
| Oahu tree snail                                          | <i>Achatinella viridans</i>                     | 1981   | 1979      | Possibly extinct  | GH/CR    | Mollusk         | Hawaii and Pacific I | USFWS 1992, 2011a              |
| Oahu tree snail                                          | <i>Achatinella vittata</i>                      | 1981   | 1953      | Possibly extinct  | G1 TH/EX | Mollusk         | Hawaii and Pacific I | USFWS 1992, 2011a              |
| Oahu tree snail                                          | <i>Achatinella vulpina</i>                      | 1981   | 1965      | Possibly extinct  | GH/CR    | Mollusk         | Hawaii and Pacific I | USFWS 1992, 2011a              |
| Oahu tree snail                                          | <i>Achatinella bellula</i>                      | 1981   | 1981      | Possibly extinct  | GH/CR    | Mollusk         | Hawaii and Pacific I | USFWS 2011a                    |
| Kauai 'akialoa                                           | <i>Akialoa stejnegeri</i>                       | 1967   | 1965      | Possibly extinct  | GX/EX    | Bird            | Hawaii and Pacific I | USFWS 2009                     |
| Brown's pigweed                                          | <i>Amaranthus brownii</i>                       | 1996   | 1983      | Possibly extinct  | G1/CR    | Plant           | Hawaii and Pacific I | USFWS 2017a                    |
| Culebra Island giant anole                               | <i>Anolis roosevelti</i>                        | 1977   | 1932      | Possibly extinct  | NA/CRPE  | Reptile         | Southeast            | USFWS 2014a                    |
| Ivory-billed woodpecker                                  | <i>Campephilus principalis</i>                  | 1967   | 1944      | Possibly extinct  | G1/CRPE  | Bird            | Southeast            | USFWS 2010a                    |
| Longjaw cisco                                            | <i>Coregonus alpenae</i>                        | 1967   | 1967      | Extinct, delisted | NA/EX    | Fish            | Midwest              | USFWS 1983a                    |
| Haha ( <i>Cyanea copelandii</i> ssp. <i>copelandii</i> ) | <i>Cyanea copelandii</i> ssp. <i>copelandii</i> | 1994   | 1957      | Possibly extinct  | G1TH/EX  | Plant           | Hawaii and Pacific I | USFWS 2012                     |
| Long-foot cyanea                                         | <i>Cyanea dolichopoda</i>                       | 2010   | 1990      | Possibly extinct  | GH/EX    | Plant           | Hawaii and Pacific I | USFWS 2017b                    |
| 'Oha ( <i>Cyanea eleeleensis</i> )                       | <i>Cyanea eleeleensis</i>                       | 2010   | 1977      | Possibly extinct  | GH/EX    | Plant           | Hawaii and Pacific I | USFWS 2017c                    |
| Haha                                                     | <i>Cyanea kolekoleensis</i>                     | 2010   | 1998      | Possibly extinct  | G1/CRPE  | Plant           | Hawaii and Pacific I | USFWS 2017d                    |
| Haha                                                     | <i>Cyanea kuhihewa</i>                          | 2010   | 2001      | Possibly extinct  | GH/CRPE  | Plant           | Hawaii and Pacific I | USFWS 2017e                    |
| Maui cyanea                                              | <i>Cyanea mauiensis</i>                         | 2013   | 1918      | Possibly extinct  | GH/EX    | Plant           | Hawaii and Pacific I | USFWS 2016a                    |
| No common name                                           | <i>Cyperus neokunthianus</i>                    | 2016   | 1996      | Possibly extinct  | GH/NA    | Plant           | Hawaii and Pacific I | USFWS 2016a                    |
| Tecopa pupfish                                           | <i>Cyprinodon nevadensis calidae</i>            | 1970   | 1970      | Extinct, delisted | G2TX/NA  | Fish            | Pacific Southwest    | USFWS 1982, Miller et al. 1989 |
| Ha'iwale                                                 | <i>Cyrtandra crenata</i>                        | 1994   | 1947      | Possibly extinct  | GH/CRPE  | Plant           | Hawaii and Pacific I | USFWS 2011b                    |
| Waiolani Cyrtandra                                       | <i>Cyrtandra waiolani</i>                       | 2012   | 2005      | Possibly extinct  | GH/EX    | Plant           | Hawaii and Pacific I | USFWS 2012b                    |
| Opuhe nalo                                               | <i>Drosophila aglaia</i>                        | 2006   | 1997      | Possibly extinct  | G1/NA    | Arthropod       | Hawaii and Pacific I | USFWS 2012c, Magnacca 2018     |
| Picture-wing fly                                         | <i>Drosophila differens</i>                     | 2006   | 1999      | Possibly extinct  | G1/NA    | Arthropod       | Hawaii and Pacific I | USFWS 2018a, Magnacca 2018     |
| Nalo mea hula                                            | <i>Drosophila neoclavisetae</i>                 | 2006   | 1975      | Possibly extinct  | G1/NA    | Arthropod       | Hawaii and Pacific I | USFWS 2018b, Magnacca 2018     |
| Picture-wing fly                                         | <i>Drosophila sharpi</i>                        | 2006   | 1991      | Possibly extinct  | G1/NA    | Arthropod       | Hawaii and Pacific I | USFWS 2017f, Magnacca 2018     |
| Mull's picture-wing                                      | <i>Drosophila tarphytrichia</i>                 | 2006   | 1997      | Possibly extinct  | G1/NA    | Arthropod       | Hawaii and Pacific I | USFWS 2012d, Magnacca 2018     |
| Na'ena'e                                                 | <i>Dubautia kenwoodii</i>                       | 2010   | 1991      | Possibly extinct  | G1/CRPE  | Plant           | Hawaii and Pacific I | USFWS 2017g                    |

|                                     |                                            |      |             |                                |          |           |                      |                                 |
|-------------------------------------|--------------------------------------------|------|-------------|--------------------------------|----------|-----------|----------------------|---------------------------------|
| Yellow-blossom pearly mussel        | <i>Epioblasma florentina florentina</i>    | 1976 | 1967        | Extinct, delisting recommended | G1TX/EX  | Mollusk   | Southeast            | USFWS 2017h                     |
| Upland combshell                    | <i>Epioblasma metastriata</i>              | 1993 | 1988        | Extinct, delisting recommended | GH/CR    | Mollusk   | Southeast            | USFWS 2008                      |
| Southern acornshell                 | <i>Epioblasma othcaloogensis</i>           | 1993 | 1974        | Extinct, delisting recommended | GHQ/CR   | Mollusk   | Southeast            | USFWS 2008                      |
| Sampson's pearl mussel              | <i>Epioblasma sampsonii</i>                | 1976 | 1935        | Extinct, delisted              | GX/EX    | Mollusk   | Midwest              | USFWS 1984                      |
| Tuberled blossom                    | <i>Epioblasma torulosa torulosa</i>        | 1976 | 1969        | Extinct, delisting recommended | G2TX/EX  | Mollusk   | Southeast            | USFWS 2017h                     |
| Turgid blossom pearly mussel        | <i>Epioblasma turgidula</i>                | 1976 | 1965        | Extinct, delisting recommended | GX/EX    | Mollusk   | Southeast            | USFWS 2017h                     |
| Amistad gambusia                    | <i>Gambusia amistadensis</i>               | 1980 | 1974        | Extinct, delisted              | GX/EX    | Fish      | Southwest            | USFWS 1987, Miller et al. 1989  |
| Maui nukupu'u                       | <i>Hemignathus affinis</i>                 | 1970 | 1967        | Possibly extinct               | G1T1/CRP | Bird      | Hawaii and Pacific I | USFWS 2006, USFWS 2010 b        |
| Kauai nukupu'u                      | <i>Hemignathus hanapepe</i>                | 1967 | egs in 1995 | Possibly extinct               | G1T1/CRP | Bird      | Hawaii and Pacific I | USFWS 2006, USFWS 2010b         |
| Santa Barbara song sparrow          | <i>Melospiza melodia graminea</i>          | 1973 | 1959        | Extinct, delisted              | G5T1/NA  | Bird      | Pacific Southwest    | USFWS 1983b                     |
| West Indian monk seal               | <i>Monachus tropicalis</i>                 | 1979 | 1952        | Extinct, delisted              | GX/EX    | Mammal    | Southeast            | NMFS 2008                       |
| Guam broadbill                      | <i>Myiagra freycineti</i>                  | 1984 | 1984        | Extinct, delisted              | NA/EX    | Bird      | Hawaii and Pacific I | USFWS 2004                      |
| Scioto madtom                       | <i>Noturus trautmani</i>                   | 1975 | 1957        | Extinct, delisting recommended | GX/EX    | Fish      | Midwest              | USFWS 2009b                     |
| Eskimo curlew                       | <i>Numenius borealis</i>                   | 1967 | 1963        | Possibly extinct               | GH/EX    | Bird      | Alaska               | USFWS 2016b                     |
| Holei                               | <i>Ochrosia kilauaeensis</i>               | 1994 | 1927        | Possibly extinct               | GH/CR    | Plant     | Hawaii and Pacific I | USFWS 2012e                     |
| Squirrel Chimney Cave Shrimp        | <i>Palaemonetes cummingi</i>               | 1990 | 1973        | Possibly extinct               | GH/CR    | Arthropod | Southeast            | USFWS 2016c                     |
| Molokai creeper                     | <i>Paroreomyza flammea</i>                 | 1970 | 1963        | Possibly extinct               | GH/EX    | Bird      | Hawaii and Pacific I | USFWS 2015a                     |
| Phyllostegia glabra var. lanaiensis | <i>Phyllostegia glabra var. lanaiensis</i> | 1991 | 1914        | Possibly extinct               | G3TH/NA  | Plant     | Hawaii and Pacific I | USFWS 2012f                     |
| Flat pigtoe                         | <i>Pleurobema marshalli</i>                | 1987 | 1980        | Extinct, delisting recommended | GX/CR    | Mollusk   | Southeast            | USFWS 2015b                     |
| Little Mariana fruit bat            | <i>Pteropus tokudae</i>                    | 1984 | 1968        | Extinct, delisting recommended | NA       | Mammal    | Hawaii and Pacific I | USFWS 2015c                     |
| Eastern cougar                      | <i>Puma concolor cougar</i>                | 1973 | 1938        | Extinct, delisted              | G5TXQ/C  | Mammal    | Northeast            | USFWS 2018c                     |
| Stirrup shell                       | <i>Quadrula stapes</i>                     | 1987 | 1984        | Extinct, delisting recommended | GH/CR    | Mollusk   | Southeast            | USFWS 2015b                     |
| Blue pike                           | <i>Sander vitreus glaucus</i>              | 1967 | 1965        | Extinct, delisted              | G5TX/NA  | Fish      | Midwest              | USFWS 1983a, Miller et al. 1989 |
| Bachman's warbler                   | <i>Vermivora bachmanii</i>                 | 1967 | 1962        | Possibly extinct               | GH/CR    | Bird      | Southeast            | USFWS 2015d                     |
| Guam bridled white-eye              | <i>Zosterops conspicillatus conspicill</i> | 1984 | 1983        | Extinct, delisting recommended | NA/EX    | Bird      | Hawaii and Pacific I | USFWS 2015                      |

## Literature Cited:

Miller, R.R., Williams, J.D. & Williams, J.E., (1989). Extinctions of North American fishes during the past century. *Fisheries* 14(6):22-38.

National Marine Fisheries Service, (2008). Federal Register, Endangered and Threatened Species; Final Rule to Remove the Caribbean Monk Seal From the Federal List of Endangered and Threatened Wildlife. <https://www.gpo.gov/fdsys/pkg/FR-2008-10-28/pdf/E8-25704.pdf#page>

U.S. Fish and Wildlife Service, (1982). Deregulation of the Tecopa Pupfish. Federal Register, Vol. 47, No 10: 2317-2319. [https://ecos.fws.gov/docs/federal\\_register/fr572.pdf](https://ecos.fws.gov/docs/federal_register/fr572.pdf)

U.S. Fish and Wildlife Service, (1983a). Deregulation of the Longjaw Cisco and the Blue Pike. September 2, 1983. Federal Register, Vol. 48, No. 172: 39941-39943. [https://ecos.fws.gov/docs/federal\\_register/fr735.pdf](https://ecos.fws.gov/docs/federal_register/fr735.pdf)

U.S. Fish and Wildlife Service, (1983b). Removal of the Santa Barbara Song Sparrow from the List of Endangered Species. Federal Register, Vol. 48, No. 198: 46336-46337. [https://ecos.fws.gov/docs/federal\\_register/fr754.pdf](https://ecos.fws.gov/docs/federal_register/fr754.pdf)

U.S. Fish and Wildlife Service, (1984). Removal of *Epioblasma sampsoni*, Sampson's pearly Mussel, from the list of Endangered and Threatened wildlife. Federal Register, Vol. 49, No.5: 1057-1058. [https://ecos.fws.gov/docs/federal\\_register/fr781.pdf](https://ecos.fws.gov/docs/federal_register/fr781.pdf)

U.S. Fish and Wildlife Service, (1987). Removal of *gambusia amistadensis*, the Amistad Gambusia, From the list of Endangered and Threatened Wildlife. Federal Register, Vol.52, No 233: 46083-46087. [https://ecos.fws.gov/docs/federal\\_register/fr1362.pdf](https://ecos.fws.gov/docs/federal_register/fr1362.pdf)

U.S. Fish and Wildlife Service, (1992). Recovery Plan for the O'ahu tree snails of the genus *Achatinella*. [https://esadocs.cci-dev.org/ESAdocs/recovery\\_plan/920630.pdf](https://esadocs.cci-dev.org/ESAdocs/recovery_plan/920630.pdf)

U.S. Fish and Wildlife Service, (2004). Removing the Mariana Mallard and the Guam broadbill from the Federal List of Endangered and Threatened Wildlife. Federal Register, Vol. 69, No. 35: 8116-8119. <https://www.gpo.gov/fdsys/pkg/FR-2004-02-23/pdf/04-3784.pdf#page=1>

U.S. Fish and Wildlife Service, (2006). Revised Recovery Plan for Hawaiian Forest Birds. [https://ecos.fws.gov/docs/recovery\\_plans/2006/060922a\\_docs/doc760.pdf](https://ecos.fws.gov/docs/recovery_plans/2006/060922a_docs/doc760.pdf)

U.S. Fish and Wildlife Service, (2008). 5-Year Review, Summary and Evaluation, Upland Combshell (*Epioblasma metastrata*), Southern acornshell (*Epioblasma othcaloogensis*) [https://ecos.fws.gov/docs/five\\_year\\_review/doc2365.pdf](https://ecos.fws.gov/docs/five_year_review/doc2365.pdf)

U.S. Fish and Wildlife Service, (2009a). 5-year Review, Summary and Evaluation, Kaua'i'akialoa (*Hemignathus procerus*, now *Akialoa stejnegeri*). [https://ecos.fws.gov/docs/five\\_year\\_review/doc2533.pdf](https://ecos.fws.gov/docs/five_year_review/doc2533.pdf)

U.S. Fish and Wildlife Service, (2009b). 5-Year Review, Summary and Evaluation, Scioto Madtom (*Noturus trautmani*). [https://ecos.fws.gov/docs/five\\_year\\_review/doc3057.pdf](https://ecos.fws.gov/docs/five_year_review/doc3057.pdf)

U.S. Fish and Wildlife Service, (2010a). Recovery Plan for the Ivory-billed Woodpecker (*Campephilus principalis*). U.S. Fish and Wildlife Service. [http://ecos.fws.gov/docs/recovery\\_plan/100719.pdf](http://ecos.fws.gov/docs/recovery_plan/100719.pdf)

U.S. Fish and Wildlife Service, (2010b). 5-Year Review: Summary and Evaluation, Kaua'i nukupu'u (*Hemignathus lucidus hanapepe*) and Maui nukupu'u (*Hemignathus lucidus affinis*). [https://ecos.fws.gov/docs/five\\_year\\_review/doc3858.pdf](https://ecos.fws.gov/docs/five_year_review/doc3858.pdf)

U.S. Fish and Wildlife Service, (2011a). Oahu tree snails (*Achatinella* spp.) 5-Year Review. [https://ecos.fws.gov/docs/five\\_year\\_review/doc3903.pdf](https://ecos.fws.gov/docs/five_year_review/doc3903.pdf)

U.S. Fish and Wildlife Service, (2011b). 5-Year Review: Short Form Summary, *Cyrtandra crenata* (ha'iwale). [https://ecos.fws.gov/docs/five\\_year\\_review/doc3819.pdf](https://ecos.fws.gov/docs/five_year_review/doc3819.pdf)

U.S. Fish and Wildlife Service, (2012a). 5-Year Review: Summary and Evaluation, *Cyanea copelandii copelandii* (Haha). [https://ecos.fws.gov/docs/five\\_year\\_review/doc4088.pdf](https://ecos.fws.gov/docs/five_year_review/doc4088.pdf)

U.S. Fish and Wildlife Service, (2012b). Federal Register. Endangered and Threatened Wildlife and Plants; Endangered Status for 23 Species on Oahu and Designation of Critical Habitat for 124 Species; Final Rule. Vol. 77 No.181: 57653. <http://www.gpo.gov/fdsys/pkg/FR-2012-09-18/pdf/2012-19561.pdf>

U.S. Fish and Wildlife Service, (2012c). 5-Year Review: Summary and Evaluation, picture-wing fly (*Drosophila aglaia*). [https://ecos.fws.gov/docs/five\\_year\\_review/doc4103.pdf](https://ecos.fws.gov/docs/five_year_review/doc4103.pdf)

U.S. Fish and Wildlife Service, (2012d). 5-Year Review: Summary and Evaluation, Picture-wing fly (*Drosophila tarphytrichia*). [https://ecos.fws.gov/docs/five\\_year\\_review/doc4092.pdf](https://ecos.fws.gov/docs/five_year_review/doc4092.pdf)

U.S. Fish and Wildlife Service, (2012e). 5-Year Review: Summary and Evaluation. *Ochrosia Kilaueaensis* (Holei). [https://ecos.fws.gov/docs/five\\_year\\_review/doc4071.pdf](https://ecos.fws.gov/docs/five_year_review/doc4071.pdf)

U.S. Fish and Wildlife Service, (2012f). 5-Year Review. *Phyllostegia glabra* var. *lanaiensis* (No common name). [https://ecos.fws.gov/docs/five\\_year\\_review/doc4068.pdf](https://ecos.fws.gov/docs/five_year_review/doc4068.pdf)

U.S. Fish and Wildlife Service, (2015a). 5-Year Review: Short Form Summary, Kakawahie or Molokai creeper (*Paroreomyza flammea*). [https://ecos.fws.gov/docs/five\\_year\\_review/doc4575.pdf](https://ecos.fws.gov/docs/five_year_review/doc4575.pdf)

U.S. Fish and Wildlife Service, (2015b). 5-Year Review: Summary and Evaluation, Black Clubshell (*Curtus*' Pearly Mussel), Stirrup shell (*Quadrula stapes*), Flat Pigtoe (Marshall's Pearly Mussel)(*Pleurobema marshalli*). [https://ecos.fws.gov/docs/five\\_year\\_review/doc4642.pdf](https://ecos.fws.gov/docs/five_year_review/doc4642.pdf)

U.S. Fish and Wildlife Service, (2015c). 5-Year Review: Short Form Summary, *Pteropus tokudae* (little Mariana fruit bat) [https://ecos.fws.gov/docs/five\\_year\\_review/doc4544.pdf](https://ecos.fws.gov/docs/five_year_review/doc4544.pdf)

U.S. Fish and Wildlife Service, (2015d). 5-Year Review, Summary and Evaluation, Bachman's Warbler (*Vermivora bachmanii*). [https://ecos.fws.gov/docs/five\\_year\\_review/doc4548.pdf](https://ecos.fws.gov/docs/five_year_review/doc4548.pdf)

U.S. Fish and Wildlife Service, (2015e). 5-Year Review: Short Form Summary, Zosterops conipicillatus conspicillatus (Guam bridled white-eye)  
[https://ecos.fws.gov/docs/five\\_year\\_review/doc4545.pdf](https://ecos.fws.gov/docs/five_year_review/doc4545.pdf)

U.S. Fish and Wildlife Service, (2016a). Endangered status for 49 species from the Hawaiian Islands. Federal Register, Vol. 81, No. 190: 67786 -67860.  
<https://www.govinfo.gov/content/pkg/FR-2016-09-30/pdf/2016-23112.pdf>

U.S. Fish and Wildlife Service, (2016b). 5-Year Review: Summary and Evaluation, Eskimo Curlew (*Numenius borealis*). [https://ecos.fws.gov/docs/five\\_year\\_review/doc4866.pdf](https://ecos.fws.gov/docs/five_year_review/doc4866.pdf)

U.S. Fish and Wildlife Service. (2016c). 5-Year Review: Summary and Evaluation, Squirrel Chimney Cave Shrimp (*Palaemonetes cummingsi*).  
[https://ecos.fws.gov/docs/five\\_year\\_review/doc5095.pdf](https://ecos.fws.gov/docs/five_year_review/doc5095.pdf)

U.S. Fish and Wildlife Service, (2017a). 5-year review, short form summary, *Amaranthus brownii* (No common name). [https://ecos.fws.gov/docs/five\\_year\\_review/doc5238.pdf](https://ecos.fws.gov/docs/five_year_review/doc5238.pdf)

U.S. Fish and Wildlife Service, (2017b). 5-Year Review, *Cyanea dolichopoda*.  
[https://ecos.fws.gov/docs/five\\_year\\_review/doc5247.pdf](https://ecos.fws.gov/docs/five_year_review/doc5247.pdf)

U.S. Fish and Wildlife Service, (2017c). 5-Year Review: summary and evaluation, *Cyanea eleeleensis*. [https://ecos.fws.gov/docs/five\\_year\\_review/doc5248.pdf](https://ecos.fws.gov/docs/five_year_review/doc5248.pdf)

U.S. Fish and Wildlife Service, (2017d). 5-Year Review: summary and evaluation, *Cyanea kolekoleensis*. [https://ecos.fws.gov/docs/five\\_year\\_review/doc5249.pdf](https://ecos.fws.gov/docs/five_year_review/doc5249.pdf)

U.S. Fish and Wildlife Service, (2017e). 5-Year Review: summary and evaluation, *Cyanea kuhihewa*. [https://ecos.fws.gov/docs/five\\_year\\_review/doc5250.pdf](https://ecos.fws.gov/docs/five_year_review/doc5250.pdf)

U.S. Fish and Wildlife Service, (2017f). 5-Year Review: summary and evaluation, picture-wing fly (*Drosophilla sharpi*). [https://ecos.fws.gov/docs/five\\_year\\_review/doc5232.pdf](https://ecos.fws.gov/docs/five_year_review/doc5232.pdf)

U.S. Fish and Wildlife Service, (2017g). 5-Year Review: summary and evaluation, *Dubautia Kenwoodii* (Na'ena'e). [https://ecos.fws.gov/docs/five\\_year\\_review/doc5264.pdf](https://ecos.fws.gov/docs/five_year_review/doc5264.pdf)

U.S. Fish and Wildlife Service, (2017h). 5-Year Review: Summary and Evaluation, Green-Blossom pearly mussel (*Epioblasma torulosa gubernaculum*), Tubercled-blossom pearly mussel (*Epioblasma torulosa torulosa*), Turgid-blossom pearly mussel (*Epioblasma turgidula*), Yellow-Blossom pearly mussel (*Epioblasma florentina florentina*).  
[https://ecos.fws.gov/docs/five\\_year\\_review/doc5656.pdf](https://ecos.fws.gov/docs/five_year_review/doc5656.pdf)

U.S. Fish and Wildlife Service, (2018a). 5-Year Review: Summary and Evaluation, picture-wing fly (*Drosophila differens*). [https://ecos.fws.gov/docs/five\\_year\\_review/doc4102.pdf](https://ecos.fws.gov/docs/five_year_review/doc4102.pdf)

U.S. Fish and Wildlife Service, (2018b). 5-Year Review: Summary and Evaluation, picture-wing fly (*Drosophila neoclavisetae*) [https://ecos.fws.gov/docs/five\\_year\\_review/doc4096.pdf](https://ecos.fws.gov/docs/five_year_review/doc4096.pdf)

U.S. Fish and Wildlife Service, (2018c). Federal Register, Endangered and Threatened Wildlife and Plants; Removing the Eastern Puma (=cougar) From the Federal List of Endangered and Threatened Wildlife. <https://www.gpo.gov/fdsys/pkg/FR-2018-01-23/pdf/2018-01127.pdf>

**Table 2.** Extinct or possibly extinct species last seen after listing under the Endangered Species Act.

| Common Name                   | Scientific                              | Listed | Last Seen | Status                         | NS/IUCN   | Taxonomic Group | Region                     | Abundance at Listing      | Reference                      |
|-------------------------------|-----------------------------------------|--------|-----------|--------------------------------|-----------|-----------------|----------------------------|---------------------------|--------------------------------|
| Liliwai                       | <i>Acaena exigua</i>                    | 1992   | 2000      | Possibly extinct               | G1/EX     | Plant           | Hawaii and Pacific Islands | None at listing, one 1997 | USFWS, 2014a; USFWS, 2016a     |
| Oahu tree snail curta         | <i>Achatinella curta</i>                | 1981   | 1989      | Possibly extinct               | G1/CR     | Mollusk         | Hawaii and Pacific Islands | Six snails seen 1983      | U.S. Army, 2004; USFWS, 2011   |
| Oahu tree snail leucorraphe   | <i>Achatinella leucorraphe</i>          | 1981   | 1989      | Possibly extinct               | G1T1/CR   | Mollusk         | Hawaii and Pacific Islands | Unknown                   | USFWS, 2011a                   |
| Oahu tree snail pulcherrima   | <i>Achatinella pulcherrima</i>          | 1981   | 1993      | Possibly extinct               | G1T1/CR   | Mollusk         | Hawaii and Pacific Islands | <50                       | USFWS, 2011a                   |
| Dusky seaside sparrow         | <i>Ammodramus maritimus nigrescens</i>  | 1967   | 1987      | Extinct, Delisted              | G4TX/EX   | Bird            | Southeast                  | 927 singing males         | USFWS 1990                     |
| Mariana mallard               | <i>Anas oustaleti</i>                   | 1977   | 1981      | Extinct, Delisted              | NA        | Bird            | Hawaii and Pacific Islands | Two males and a female    | USFWS 2004                     |
| Morro Bay kangaroo rat        | <i>Dipodomys heermanni morroensis</i>   | 1970   | 1993      | Possibly extinct               | G3TH/CR   | Mammal          | Pacific Southwest          | >2,000                    | USFWS 2011b                    |
| Fresno kangaroo rat           | <i>Dipodomys nitratoides exilis</i>     | 1985   | 1992      | Possibly extinct               | G3TH/NA   | Mammal          | Pacific Southwest          | Unknown                   | USFWS 2010a                    |
| Golden coqui                  | <i>Eleutherodactylus jasperi</i>        | 1977   | 1981      | Possibly extinct               | NA/CR     | Amphibian       | Southeast                  | Unknown                   | USFWS 2013a                    |
| Curtis' pearlymussel          | <i>Epioblasma florentina curtisii</i>   | 1976   | 1993      | Possibly extinct               | G1T1      | Mollusk         | Southeast                  | >100                      | USFWS 2010b                    |
| White cat's paw pearly mussel | <i>Epioblasma obliquata perobliqua</i>  | 1976   | 1999      | Possibly extinct               | G1T1      | Mollusk         | Midwest                    | Two in 1975               | USFWS 2013b                    |
| Green blossom pearly mussel   | <i>Epioblasma torulosa gubernaculum</i> | 1976   | 1982      | Extinct, delisting recommended | G2TX/EX   | Mollusk         | Southeast                  | One after listing         | USFWS 2017a                    |
| Slender chub                  | <i>Erimystax cahni</i>                  | 1977   | 1996      | Possibly extinct               | G1/EN     | Fish            | Southeast                  | <30                       | USFWS 2014b                    |
| Maryland darter               | <i>Etheostoma sellare</i>               | 1967   | 1988      | Possibly extinct               | GH/EX     | Fish            | Northeast                  | <50                       | Burkhead 2012, USFWS 2007      |
| San Marcos gambusia           | <i>Gambusia georgei</i>                 | 1980   | 1982      | Extinct                        | GX/EX     | Fish            | Southwest                  | Three                     | Burkhead 2012, USFWS 1996      |
| Hau kuahiwi                   | <i>Hibiscadelphus woodii</i>            | 1996   | 2006      | Possibly extinct               | G1/EX     | Plant           | Hawaii and Pacific Islands | Four trees                | USFWS 2017b                    |
| Maui 'ākepa                   | <i>Loxops ochraceus</i>                 | 1970   | 1988      | Possibly extinct               | G1TH/CRPE | Plant           | Hawaii and Pacific Islands | Unknown                   | Scott et al. 2008, USFWS 2015a |
| Po'ouli                       | <i>Melamprosops phaeosoma</i>           | 1975   | 2004      | Possibly extinct               | G1/CR     | Bird            | Hawaii and Pacific Islands | Unknown                   | USFWS 2015b                    |
| Kauai 'o'o                    | <i>Moho braccatus</i>                   | 1967   | 1987      | Possibly extinct               | GH/EX     | Bird            | Hawaii and Pacific Islands | Unknown                   | USFWS 2009a                    |
| Molokai thrush                | <i>Myadestes lanaiensis rutha</i>       | 1970   | 1980      | Possibly extinct               | GHTH/CRPE | Bird            | Hawaii and Pacific Islands | Estimated 36 birds        | Scott et al. 2008, USFWS 2018  |
| Large Kauai thrush            | <i>Myadestes myadestinus</i>            | 1970   | 1987      | Possibly extinct               | GH/EX     | Bird            | Hawaii and Pacific Islands | Estimated 337 birds       | USFWS 2009b                    |
| Oahu creeper                  | <i>Paroreomyza maculata</i>             | 1970   | 1978      | Possibly extinct               | GH/CRPE   | Bird            | Hawaii and Pacific Islands | <10                       | USFWS 2013c                    |
| Lotis blue butterfly          | <i>Lycaeides argyrognomon lotis</i>     | 1976   | 1983      | Possibly extinct               | G5TH/NA   | Arthropod       | Pacific Southwest          | <30                       | USFWS 2011c                    |
| Black clubshell               | <i>Pleurobema curtum</i>                | 1987   | 1990      | Possibly extinct               | GH/CR     | Mollusk         | Southeast                  | Unknown                   | USFWS 2015c                    |
| 'O'u                          | <i>Psittirostra psittacea</i>           | 1967   | 1989      | Possibly extinct               | G1/CRPE   | Bird            | Hawaii and Pacific Islands | <500                      | Scott et al. 2008, USFWS 2015d |
| Pamakani                      | <i>Tetramolopium capillare</i>          | 1994   | 2001      | Possibly extinct               | G1/NA     | Plant           | Hawaii and Pacific Islands | <200                      | USFWS 2012                     |

## Literature Cited:

Burkhead, N.M., (2012). Extinction Rates in North American Freshwater Fishes, 1900–2010. *BioScience*, 62, 798-808.

Scott, J. M., Ramsey, F. L., Lammertink, M., Rosenberg, K. V., Rohrbaugh, R., Wiens, J. A., & Reed, J. M., (2008). When is an “extinct” species really extinct? Gauging the search efforts for Hawaiian forest birds and the Ivory-billed Woodpecker. *Avian Conservation and Ecology*, 3, 3.

U.S. Army, (2004). Garrison Hawaii O’ahu Training Areas Natural Resource Management. Final Report. (*Achatinella curta*). Prepared by the Pacific Cooperative Studies Unit. [http://manoa.hawaii.edu/hpicesu/DPW/2004\\_YER/YER2004\\_edited.pdf](http://manoa.hawaii.edu/hpicesu/DPW/2004_YER/YER2004_edited.pdf)

U.S. Fish and Wildlife Service, (1990). Final Rule to Delist the Dusky Seaside Sparrow and Remove its Critical Habitat Designation. Federal Register, Vol. 55, No. 239: 51112-51114. [https://ecos.fws.gov/docs/federal\\_register/fr1798.pdf](https://ecos.fws.gov/docs/federal_register/fr1798.pdf)

U.S. Fish and Wildlife Service, (1996). Recovery Plan for the San Marcos and Comal Springs and Associated Aquatic Ecosystems (Revised). [https://ecos.fws.gov/docs/recovery\\_plan/960214.pdf](https://ecos.fws.gov/docs/recovery_plan/960214.pdf)

U.S. Fish and Wildlife Service, (2004). Removing the Mariana Mallard and the Guam broadbill from the Federal List of Endangered and Threatened Wildlife. Federal Register, Vol. 69, No. 35: 8116-8119. <https://www.gpo.gov/fdsys/pkg/FR-2004-02-23/pdf/04-3784.pdf#page=1>

U.S. Fish and Wildlife Service, (2007). 5-Year Review: Summary and Evaluation, Maryland darter (*Etheostoma sellare*). [https://ecos.fws.gov/docs/five\\_year\\_review/doc1173.pdf](https://ecos.fws.gov/docs/five_year_review/doc1173.pdf)

U.S. Fish and Wildlife Service, (2009a). 5-Year Review, Summary and Evaluation, Kaua’i’o’o (*Moho braccatus*). [https://ecos.fws.gov/docs/five\\_year\\_review/doc2534.pdf](https://ecos.fws.gov/docs/five_year_review/doc2534.pdf)

U.S. Fish and Wildlife Service, (2009b). 5-Year Review, Summary and Evaluation, Kama’o or Large Kauna’i thrush (*Myadestes myadestinus*). [https://ecos.fws.gov/docs/five\\_year\\_review/doc2531.pdf](https://ecos.fws.gov/docs/five_year_review/doc2531.pdf)

U.S. Fish and Wildlife Service (2010a), 5-Year Review: Summary and Evaluation, Fresno Kangaroo Rat (*Dipodomys nitratodes exilis*). [https://ecos.fws.gov/docs/five\\_year\\_review/doc3214.pdf](https://ecos.fws.gov/docs/five_year_review/doc3214.pdf)

U.S. Fish and Wildlife Service, (2010b). 5-Year Review The Curtis’ Pearlymussel (*Epioblasma florentina curtisii*). [https://ecos.fws.gov/docs/five\\_year\\_review/doc3119.pdf](https://ecos.fws.gov/docs/five_year_review/doc3119.pdf)

U.S. Fish and Wildlife Service, (2011a). Oahu tree snails (*Achatinella* spp.) 5-Year Review. [https://ecos.fws.gov/docs/five\\_year\\_review/doc3903.pdf](https://ecos.fws.gov/docs/five_year_review/doc3903.pdf)



U.S. Fish and Wildlife Service, (2011b). Morro Bay Kangaroo Rat (*Dipodomys heermanni morroensis*), 5-Year Review: Summary and Evaluation. [https://ecos.fws.gov/docs/five\\_year\\_review/doc3641.pdf](https://ecos.fws.gov/docs/five_year_review/doc3641.pdf)

U.S. Fish and Wildlife Service, (2011c). 5-year Review: Summary and Evaluation, lotis blue butterfly (*Lycaeides argyrognomon lotis*) [https://ecos.fws.gov/docs/five\\_year\\_review/doc3960.pdf](https://ecos.fws.gov/docs/five_year_review/doc3960.pdf)

U.S. Fish and Wildlife Service, (2012). 5-year Review: Summary and Evaluation, Tetramolopium capillare (Pamakani). [https://ecos.fws.gov/docs/five\\_year\\_review/doc4056.pdf](https://ecos.fws.gov/docs/five_year_review/doc4056.pdf)

U.S. Fish and Wildlife Service, (2013a). 5-Year Review Golden Coqui (*Eleutherodactylus jasperi*) [https://ecos.fws.gov/docs/five\\_year\\_review/doc4276.pdf](https://ecos.fws.gov/docs/five_year_review/doc4276.pdf)

U.S. Fish and Wildlife Service, (2013b). 5-Year Review, White Cat's Paw Pearly Mussel (*Epioblasma obliquata perobliqua*). [https://ecos.fws.gov/docs/five\\_year\\_review/doc4135.pdf](https://ecos.fws.gov/docs/five_year_review/doc4135.pdf)

U.S. Fish and Wildlife Service, (2013c). 5-Year Review: Short Form Summary, Paroreomyza maculate (O'ahu creeper). [https://ecos.fws.gov/docs/five\\_year\\_review/doc4246.pdf](https://ecos.fws.gov/docs/five_year_review/doc4246.pdf)

U.S. Fish and Wildlife Service, (2014a). 5-Year Review, Acaena exigua (Liliwai). [https://ecos.fws.gov/docs/five\\_year\\_review/doc4384.pdf](https://ecos.fws.gov/docs/five_year_review/doc4384.pdf)

U.S. Fish and Wildlife Service, (2014b). 5-Year Review: Slender Chub (*Erimystax (=Hybopsis)cahni*) [https://ecos.fws.gov/docs/five\\_year\\_review/doc4357.pdf](https://ecos.fws.gov/docs/five_year_review/doc4357.pdf)

U.S. Fish and Wildlife Service, (2015a). 5-Year Review: Short Form Summary, Maui akepa (*Loxops coccineus ochraceus*) [https://ecos.fws.gov/docs/five\\_year\\_review/doc4568.pdf](https://ecos.fws.gov/docs/five_year_review/doc4568.pdf)

U.S. Fish and Wildlife Service, (2015b). 5-Year Review: Short Form Summary, Po'ouli (*Melamprosops Phaeosoma*). [https://ecos.fws.gov/docs/five\\_year\\_review/doc4578.pdf](https://ecos.fws.gov/docs/five_year_review/doc4578.pdf)

U.S. Fish and Wildlife Service, (2015c). 5-Year Review: Summary and Evaluation, Black Clubshell (Curtus' Pearly Mussel), Stirrup shell (*Quadrula stapes*), Flat Pigtoe (Marshall's Pearly Mussel)(*Pleurobema marshalli*). [https://ecos.fws.gov/docs/five\\_year\\_review/doc4642.pdf](https://ecos.fws.gov/docs/five_year_review/doc4642.pdf)

U.S. Fish and Wildlife Service, (2015d). 5-Year Review: Short Form Summary. Ou (*Psittirostra Psittacea*) [https://ecos.fws.gov/docs/five\\_year\\_review/doc4577.pdf](https://ecos.fws.gov/docs/five_year_review/doc4577.pdf)

U.S. Fish and Wildlife Service, (2016a). Endangered and threatened wildlife and plants, designation and nondesignation of critical habitat on Molokai, Lanai, Maui, and Kahoolawe for 135 species. Federal Register, 81, 17790-18108.

U.S. Fish and Wildlife Service, (2017a). 5-Year Review: Summary and Evaluation, Green-Blossom pearly mussel (*Epioblasma torulosa gubernaculum*), Tubercled-blossom pearly mussel (*Epioblasma torulosa torulosa*), Turgid-blossom pearly mussel (*Epioblasma turgidula*), Yellow-

Blossom pearly mussel (*Epioblasma florentina florentina*).  
[https://ecos.fws.gov/docs/five\\_year\\_review/doc5656.pdf](https://ecos.fws.gov/docs/five_year_review/doc5656.pdf)

U.S. Fish and Wildlife Service, (2017b). 5-Year Review: summary and evaluation, *Dubautia Kenwoodii* (Na'ena'e). [https://ecos.fws.gov/docs/five\\_year\\_review/doc5264.pdf](https://ecos.fws.gov/docs/five_year_review/doc5264.pdf)

U.S. Fish and Wildlife Service, (2018). 5-Year Review: Short Form Summary, Olomao or Molokai Thrush (*Myadestes lanaiensis rutha*).  
[https://ecos.fws.gov/docs/five\\_year\\_review/doc5760.pdf](https://ecos.fws.gov/docs/five_year_review/doc5760.pdf)
